# Supplementary material for: Seasonal variation of 25-Hydroxyvitamin D and indices of carbohydrate and lipid metabolism in postmenopausal women
Source: PeerJ. 2021 May 13;9:e11341. doi: 10.7717/peerj.11341 (PMC8126260; doi:10.7717/peerj.11341)
Supplement: Supplemental Information 1 [file peerj-09-11341-s001.xlsx]

## Sheet: Arkusz1
Subjects
	Age [years]	Fish consumption/week	Height [cm]	Body mass [kg] _1	BMI [kg/m2] _1	BMI range	Fat mass [kg] _1	Fat mass [%] _1	25(OH)D [ng/ml] _1	Glucose [mmol/l] _1	Insulin [µIU/ml] _1	HOMA-IR_1	Total cholesterol [mg/dl] _1	TG [mg/dl] _1	HDL [mg/dl] _1	LDL [mg/dl] _1	PTH [pg/ml] _1	Sclerostin [ng/ml] _1	Body mass [kg]_2	Fat mass [kg] _2	Fat mass [%] _2	25(OH)D [ng/dl] _2	Glucose [mmol/l] _2	Insulin [µIU/ml] _2	HOMA-IR _2	Total cholesterol [mg/dl] _2	TG [mg/dl] _2	HDL [mg/dl] _2	LDL [mg/dl] _2	PTH [pg/ml]_2	Sclerostin [ng/ml] _2
1	59	1	159	70.2	27.8	normal	25.9	37	16.2	5.11	13.83	3.14	231	95	63.6	147.5	56.51	0.561	71.7	25.6	35.7	12.5	4.73	11.66	2.45	225	95	63.2	138.7	50.19	0.348
2	60	1	159	64.6	25.6	normal	22	34.1	26.6	5.22	10.66	2.47	248	73	72.5	156	52.78	0.473	64.1	21.5	33.5	19.2	4.67	7.21	1.5	244	71	72	144.3	32.54	0.335
3	65	1	157	56.8	23	normal	18.3	32.3	25.2	4.62	7.45	1.53	214	82	44.2	155.1	40.4	0.56	57	18.2	31.9	22.2	4.51	8.57	1.72	252	105	45.9	182.9	33.29	0.633
4	57	1	164	86.4	32.1	above normal	33.3	38.5	29.5	5.66	14.18	3.57	233	123	59.7	155.9	80.9	0.495	87.5	33.2	38	21.5	5.33	7.41	1.76	221	108	63	138.4	69.99	0.425
5	58	<1	175	86.6	28.3	above normal	35.7	41.3	19.8	5.5	9.96	2.43	201	61	82.7	93.6	62.27	0.616	87.2	36.1	41.4	16.6	5.33	11.32	2.68	247	69	88.8	134.4	62.5	0.508
6	63	<1	153	58.6	25	normal	18.6	31.7	27.7	5.66	12.24	3.08	286	237	56.5	185.3	45.93	0.267	58.4	18.3	31.3	26.9	5.22	10.46	2.43	266	173	58.4	172.6	38.69	0.177
7	60	1	157	69.3	28.1	above normal	25.1	36.2	29.4	5.28	15.8	3.71	185	78	71.1	90.8	40.15	0.669	69.3	25.1	36.2	18.1	5.5	11.35	2.77	149	59	56.7	76.3	29.55	1.31
8	65	1	154	103.4	43.6	above normal	46.8	45.2	18	5.17	16.73	3.84	220	115	54.1	146.1	43.29	0.49	100.2	48	47.9	15.3	5.28	15.84	3.72	240	63	58.2	161.8	51.84	0.616
9	52	1	163	66.3	25	normal	23.5	35.4	28	4.89	7.87	1.71	249	87	76.6	149.6	62.96	0.646	65.8	22.6	34.4	20.1	5.06	8.49	1.91	260	84	75.3	157.5	75.36	0.914
10	64	1	161	64	24.7	normal	22.8	35.5	42.2	5.33	13.41	3.18	303	51	91.6	184	50.43	0.576	62.4	22.2	35.5	35.2	4.67	12.21	2.53	282	49	92.5	163.5	44.25	0.368
11	65	1	154	62.3	26.3	normal	24.7	39.7	33.8	5.33	10	2.37	307	124	74.4	193	36.74	0.493	62.3	24.7	39.7	26.2	5.55	10.5	2.59	293	121	68.5	192.8	53.72	0.702
12	68	1	157	60	24.3	normal	21.4	35.7	53.7	5.61	9.19	2.29	337	126	69.5	239.6	46.88	0.71	60	21.4	35.7	49.9	5.83	10.54	2.73	334	105	70.1	241.3	49.96	0.697
13	63	2	152	68.8	29.8	above normal	26.6	38.7	38.8	6.76	10	3	267	64	66.5	183.9	34.77	0.465	67.9	27.9	41.1	31.4	6.65	9.57	2.83	317	89	68.9	232.2	30.55	0.684
14	66	1	159	70.7	28	normal	27	38.2	32.5	5.17	20.72	4.76	245	127	50	174.3	33.04	0.458	70.8	26.5	37.4	20.9	5.28	14.37	3.37	263	123	55.8	185.1	32.54	0.576
15	62	1	161	59	22.8	normal	18	30.5	34.5	5.06	8.41	1.89	206	68	70.2	121.1	36.49	0.415	58.6	19.5	33.2	33.8	5.11	6.87	1.56	207	52	68.5	117.7	35.27	0.492
16	72	1	156	73.6	30.2	above normal	30.4	41.3	33.4	6.32	23.23	6.53	301	208	54.5	212.1	53.01	0.333	72.9	28.8	39.5	25.9	5.33	11.74	2.78	284	191	48.9	210.3	60.9	0.33
